# Supplementary material for: Restructuring multi-phase interfaces from Cu-based metal–organic frameworks for selective electroreduction of CO 2 to C 2 H 4
Source: Royal Society of Chemistry journal article supplement (doi:10.1039/d4sc00967c), 2024-01-01
Supplement: d4sc00967c1.pdf [file d4sc00967c1.pdf]

Electronic Supplementary Information

**Restructuring multi-phase interfaces from Cu-based metal-organic frameworks for selective electroreduction of CO<sub>2</sub> to C<sub>2</sub>H<sub>4</sub>**

Jiye Feng,<sup>a</sup> Wenbiao Zhang,<sup>a,b</sup> Danni Shi,<sup>a</sup> Yingshuai Jia,<sup>b</sup> Yi Tang,<sup>b</sup> Yuying Meng,<sup>a</sup> and Qingsheng Gao<sup>\*a</sup>

<sup>a</sup> College of Chemistry and Materials Science, Guangdong Provincial Key Laboratory of Functional Supramolecular Coordination Materials and Applications, Jinan University, Guangzhou 510632, P. R. China. E-mail: [tqsgao@jnu.edu.cn](mailto:tqsgao@jnu.edu.cn)

<sup>b</sup> Department of Chemistry, Shanghai Key Laboratory of Molecular Catalysis and Innovative Materials, Laboratory of Advanced Materials and Collaborative Innovation Center of Chemistry for Energy Materials, Fudan University, Shanghai 200433, China.

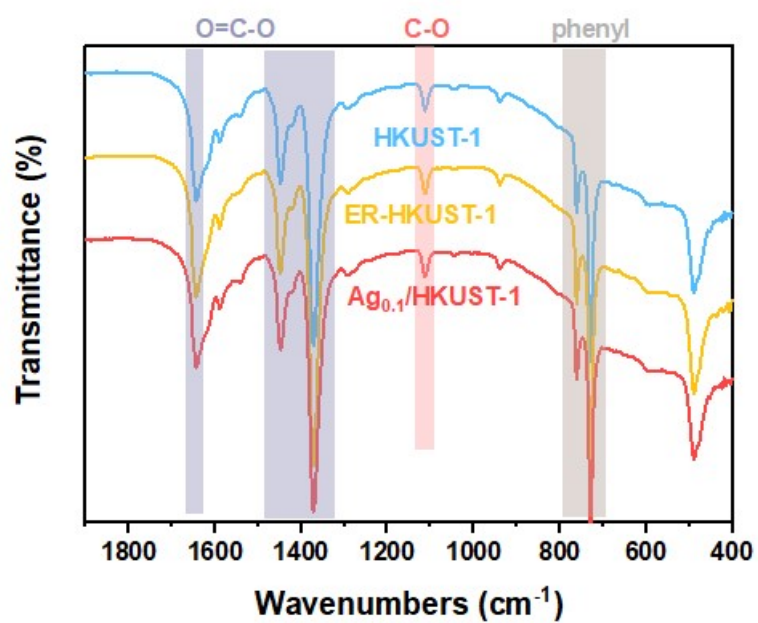

Fig. S1. FT-IR spectra of HKUST-1, ER-HKUST-1 and Ag<sub>0.1</sub>/HKUST-1.

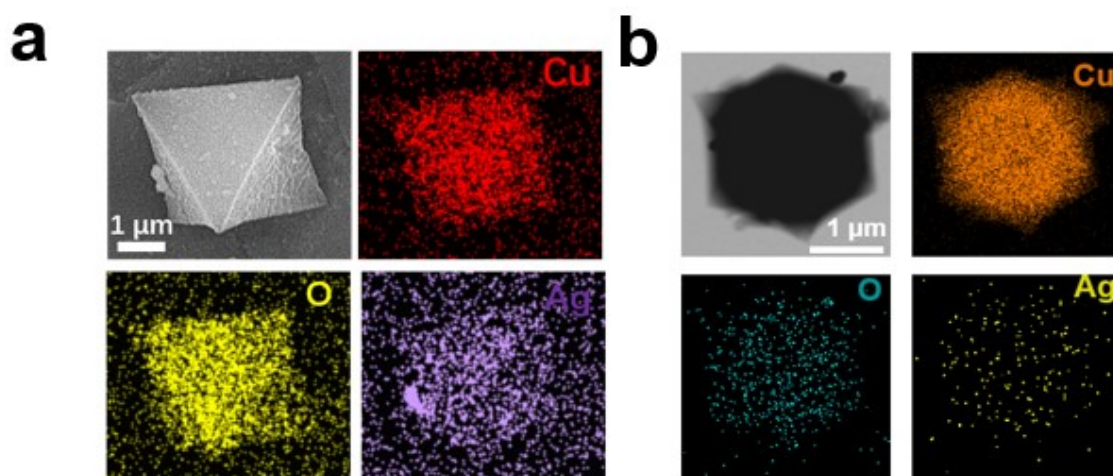

Fig. S2. (a) SEM and (b) TEM corresponding elemental mapping of Ag<sub>0.1</sub>/HKUST-1.

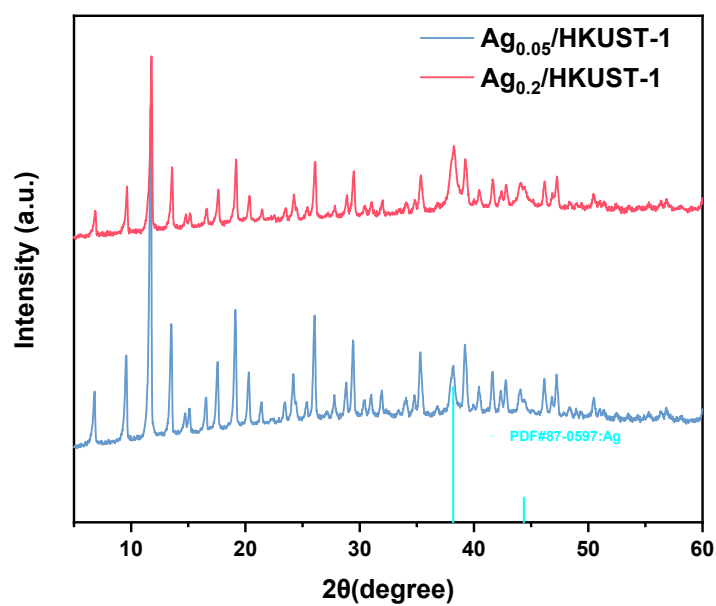

Fig. S3. XRD patterns of the  $\text{Ag}_{0.05}/\text{HKUST-1}$  and  $\text{Ag}_{0.2}/\text{HKUST-1}$ .

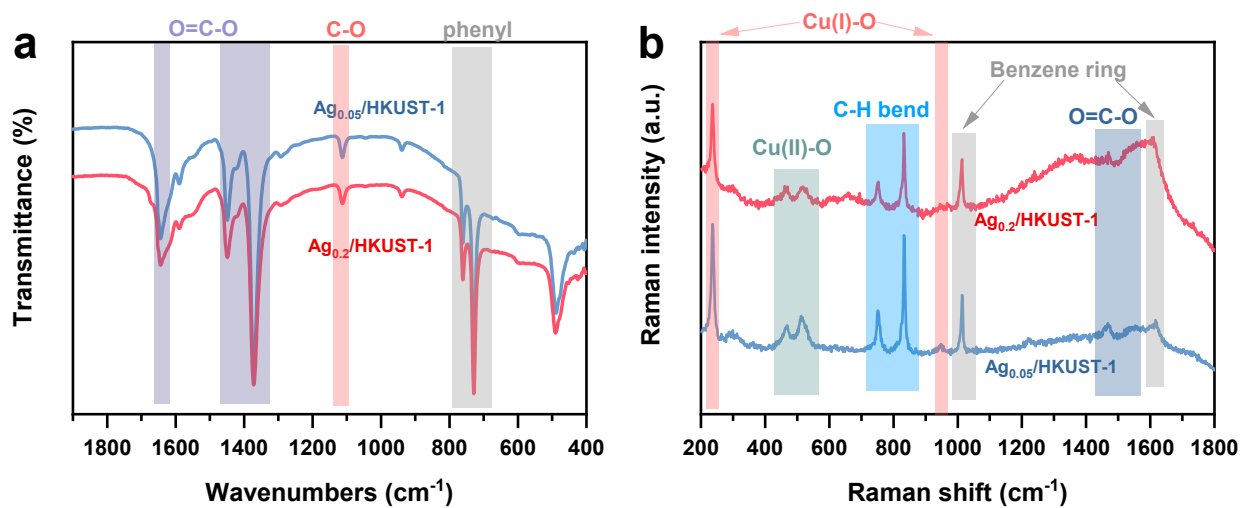

Fig. S4. (a) FT-IR spectra and (b) Raman spectra of  $\text{Ag}_{0.05}/\text{HKUST-1}$  and  $\text{Ag}_{0.2}/\text{HKUST-1}$ .

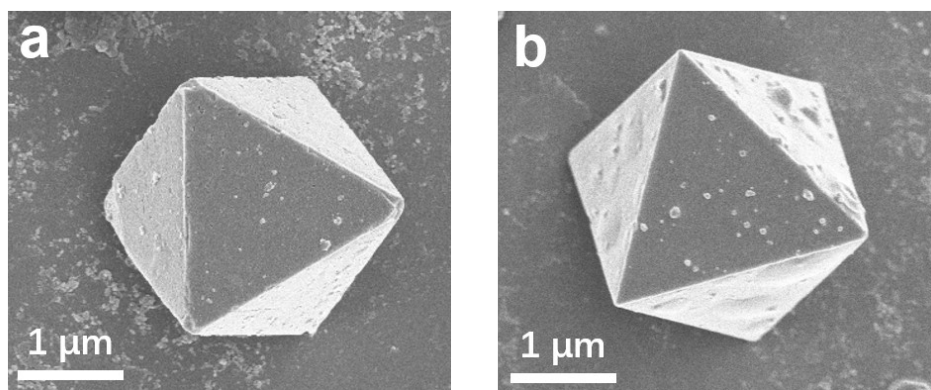

**Fig. S5.** SEM images of (a)  $\text{Ag}_{0.05}/\text{HKUST-1}$  and (b)  $\text{Ag}_{0.2}/\text{HKUST-1}$ .

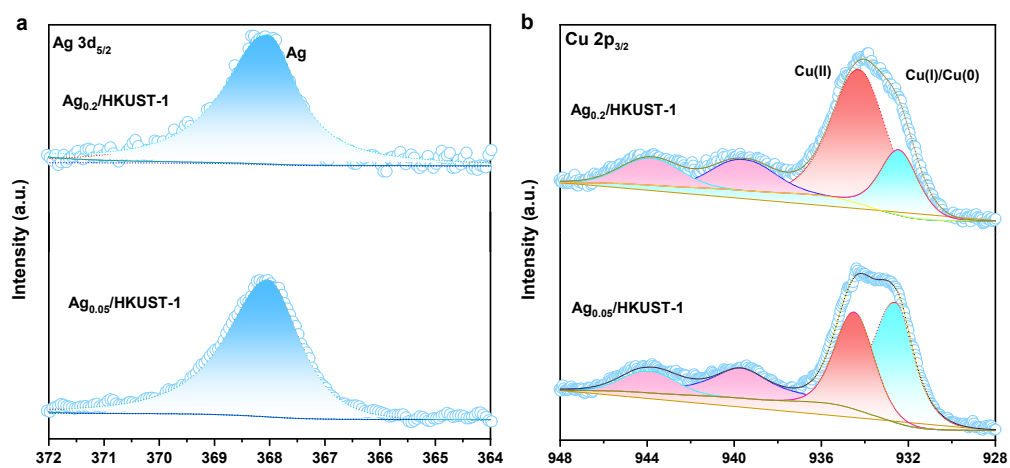

**Fig. S6.** High-resolution (a)  $\text{Ag } 3d_{5/2}$  and (b)  $\text{Cu } 2p_{3/2}$  XPS spectra of  $\text{Ag}_{0.05}/\text{HKUST-1}$  and  $\text{Ag}_{0.2}/\text{HKUST-1}$ .

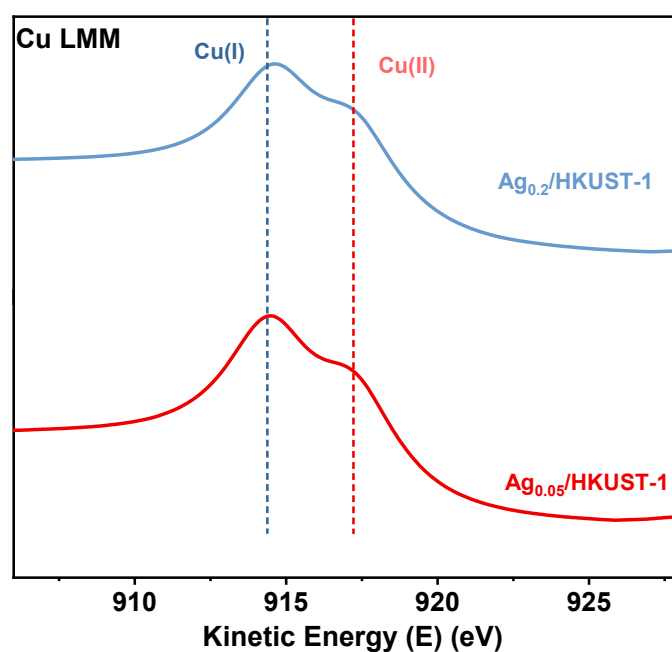

**Fig. S7.** Cu LMM Auger profiles of  $\text{Ag}_{0.05}/\text{HKUST-1}$  and  $\text{Ag}_{0.2}/\text{HKUST-1}$ .

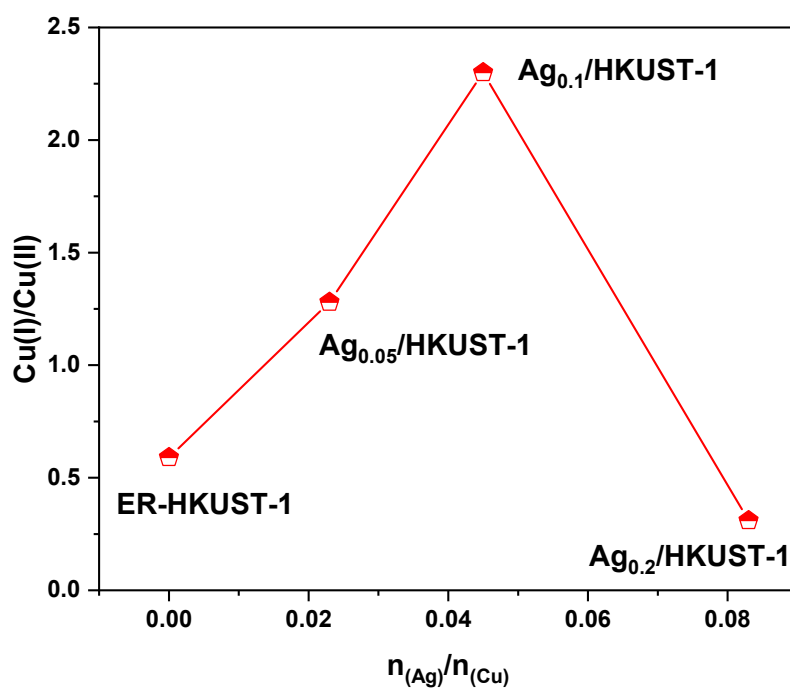

**Fig. S8.** Cu(I)/Cu(II) molar ratios of ER-HKUST-1,  $\text{Ag}_{0.05}/\text{HKUST-1}$ ,  $\text{Ag}_{0.1}/\text{HKUST-1}$  and  $\text{Ag}_{0.2}/\text{HKUST-1}$ . The Ag/Cu molar ratios of the samples were obtained from ICP-ES measurements and Cu(I)/Cu(II) molar ratios from the integration of Cu  $2p_{3/2}$  XPS peaks.

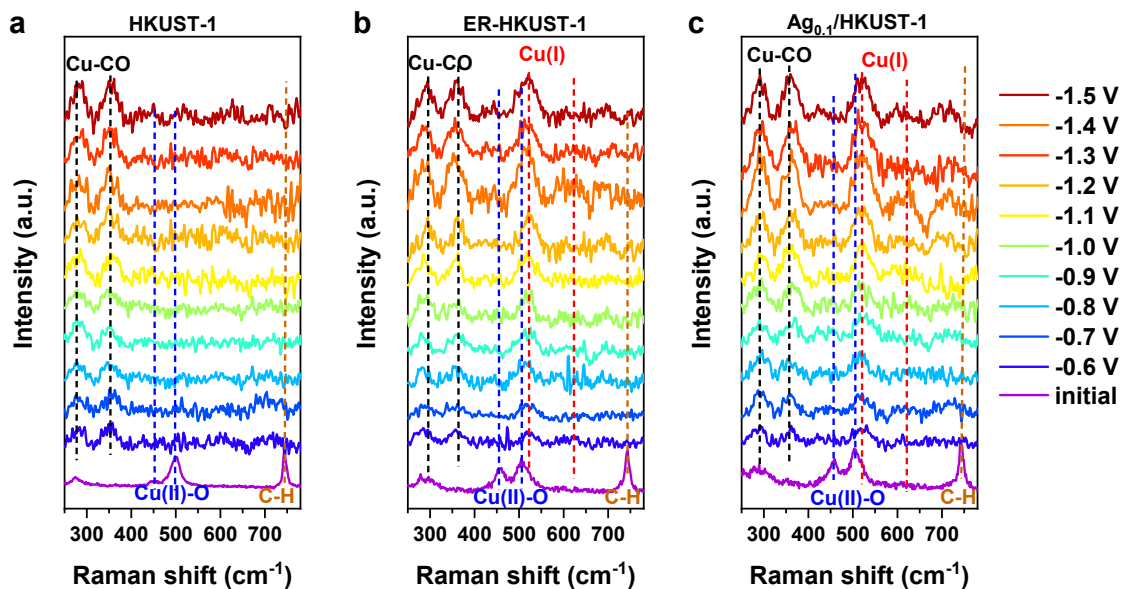

**Fig. S9.** *In situ* Raman spectra during electrochemical reconstruction under different potential of (a) HKUST-1, (b) ER-HKUST-1 and (c)  $Ag_{0.1}/HKUST-1$ . *In situ* Raman measurements were carried out using a laser confocal Raman microspectrometer (Horiba HR-800) with a 532 nm laser. The experiments were conducted in a custom-designed three electrode SERS cell with an Ag/AgCl electrode as the reference electrode and a graphite rod as the counter electrode in the anode chamber. The electrolyte was 1.0 M KOH plugged with  $CO_2$ .

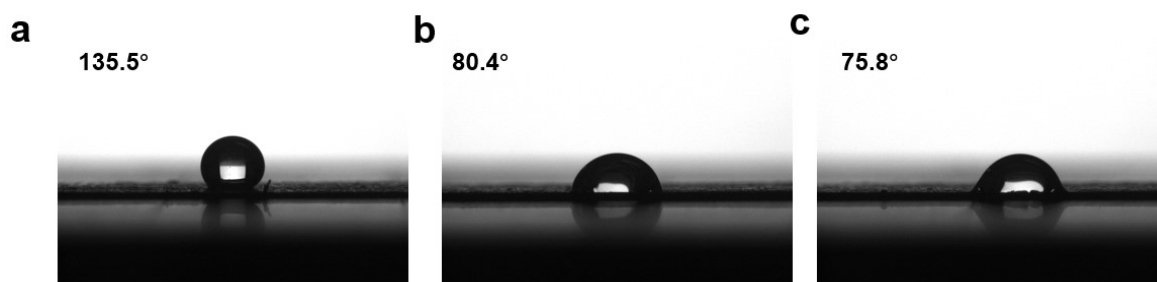

**Fig. S10.** The average water droplet contact angle of (a)  $Ag_{0.1}/HKUST-1$ , (b) ER-HKUST-1 and (c) HKUST-1 after reconstruction.

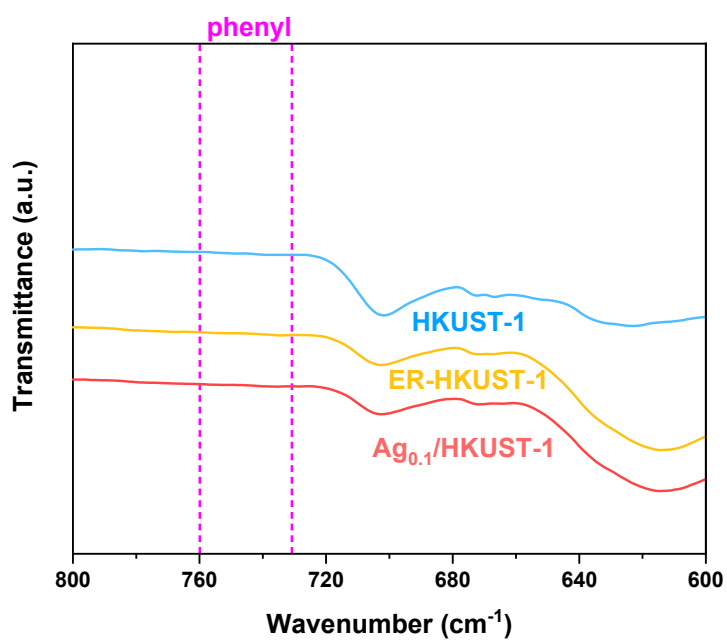

**Fig. S11.** FT-IR spectra of HKUST-1, ER-HKUST-1 and  $\text{Ag}_{0.1}/\text{HKUST-1}$  after reconstruction.

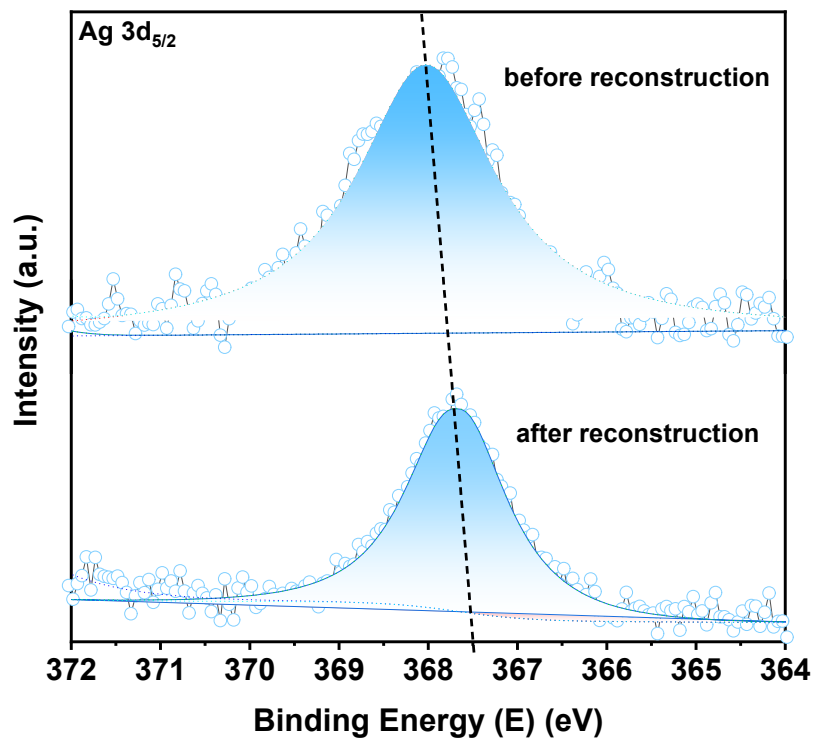

**Fig. S12.** High-resolution  $\text{Ag } 3d_{5/2}$  XPS profiles of  $\text{Ag}/\text{Cu}/\text{Cu}_2\text{O}_{\text{Ag}0.1}/\text{HKUST-1}$  before and after reconstruction.

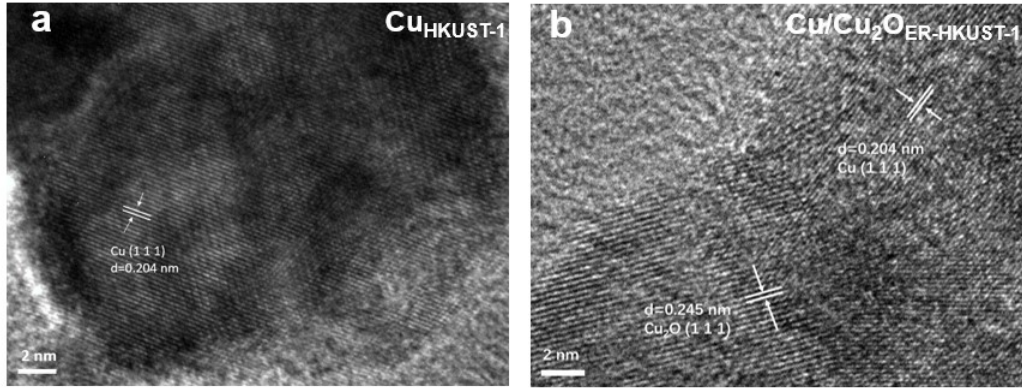

**Fig. S13.** HRTEM images of (a)  $\text{Cu}_{\text{HKUST-1}}$  and (b)  $\text{Cu}/\text{Cu}_2\text{O}_{\text{ER-HKUST-1}}$ .

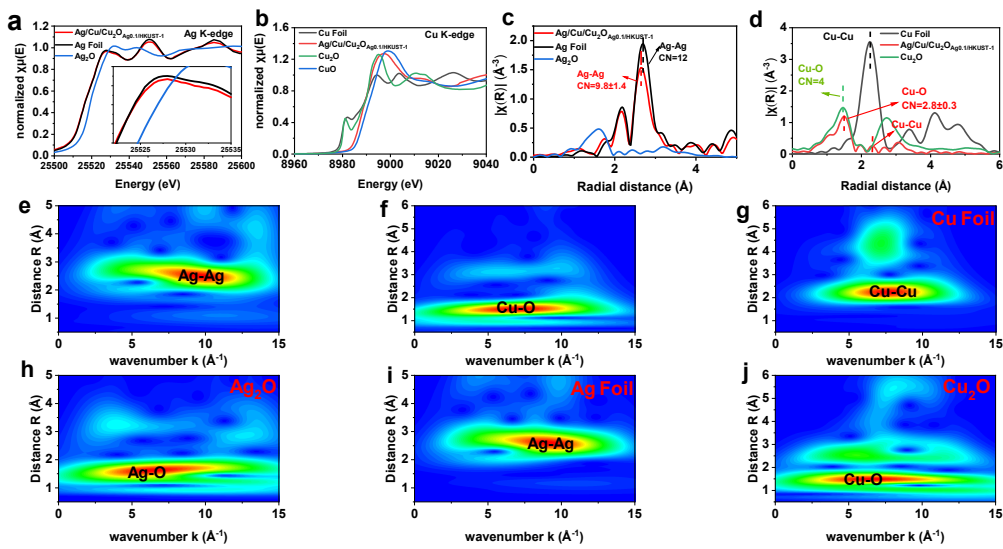

**Fig. S14.** (a) Normalized XANES and the enlarged white line (the inset) spectra of Ag K-edge in  $\text{Ag}/\text{Cu}/\text{Cu}_2\text{O}_{\text{Ag0.1HKUST-1}}$ ,  $\text{Ag}_2\text{O}$  and Ag Foil. (b) Normalized XANES of Cu K-edge in  $\text{Ag}/\text{Cu}/\text{Cu}_2\text{O}_{\text{Ag0.1HKUST-1}}$ ,  $\text{Cu}_2\text{O}$ ,  $\text{CuO}$  and Cu Foil. (c) Fourier transform of Ag K-edge in  $\text{Ag}/\text{Cu}/\text{Cu}_2\text{O}_{\text{Ag0.1HKUST-1}}$ ,  $\text{Cu}_2\text{O}$ ,  $\text{CuO}$  and Cu Foil. (d) Fourier transform of Cu K-edge in  $\text{Ag}/\text{Cu}/\text{Cu}_2\text{O}_{\text{Ag0.1HKUST-1}}$ ,  $\text{Cu}_2\text{O}$  and Cu Foil. Wavelet transform of (e) Ag and (f) Cu K-edges in  $\text{Ag}/\text{Cu}/\text{Cu}_2\text{O}_{\text{Ag0.1HKUST-1}}$ . Wavelet transform of (g) Cu foil, (h)  $\text{Ag}_2\text{O}$ , (i) Ag Foil and (j)  $\text{Cu}_2\text{O}$ .



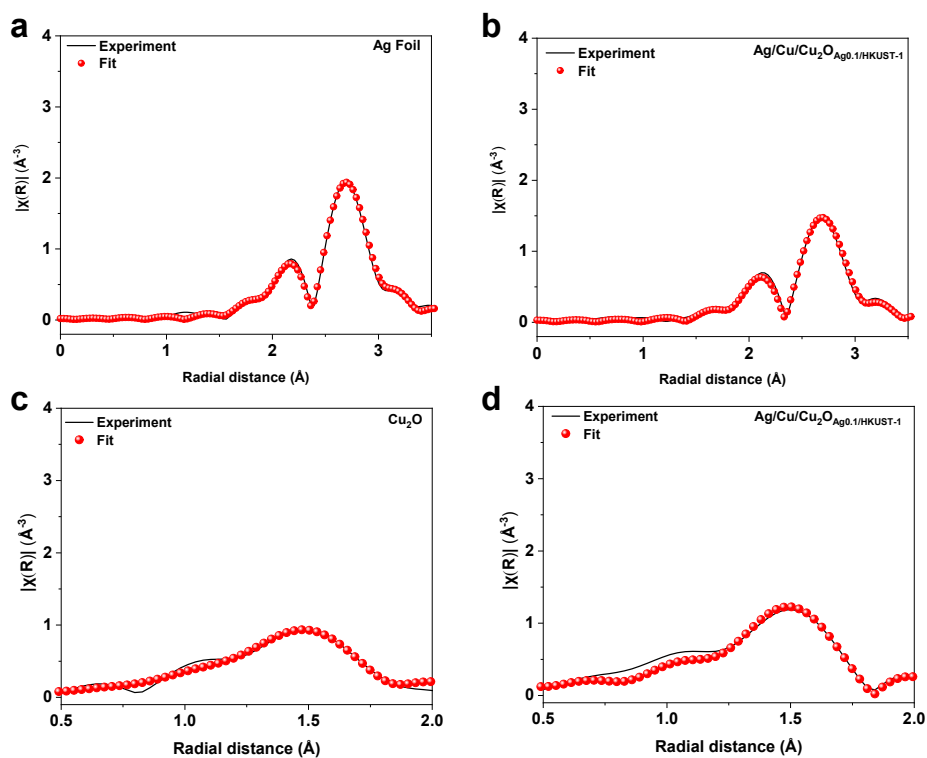

**Fig. S15.** Fourier transform of Ag K-edge EXAFS fitting results of (a) Ag foil and (b) Ag/Cu/Cu<sub>2</sub>O<sub>Ag0.1</sub>HKUST-1, and Cu K-edge EXAFS fitting results of (c) Cu<sub>2</sub>O and (d) Ag/Cu/Cu<sub>2</sub>O<sub>Ag0.1</sub>HKUST-1.

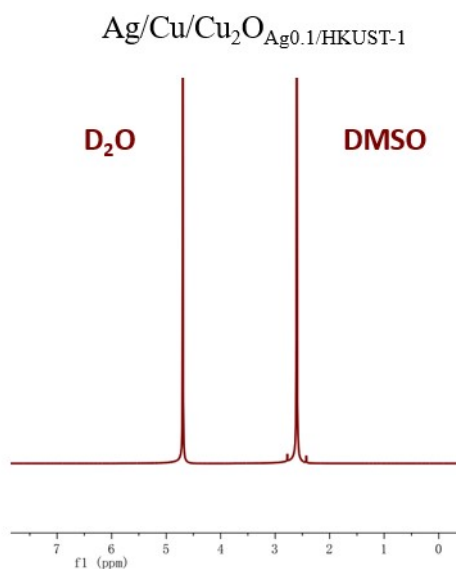

**Fig. S16.** <sup>1</sup>H NMR of liquid products obtained on Ag/Cu/Cu<sub>2</sub>O<sub>Ag0.1</sub>/HKUST-1 at -1.3 V (vs. RHE) in Flow cell. 0.1 mL of the electrolyte was mixed with 0.5 mL of D<sub>2</sub>O, and DMSO (Dimethyl sulphoxide) was used as an internal standard.

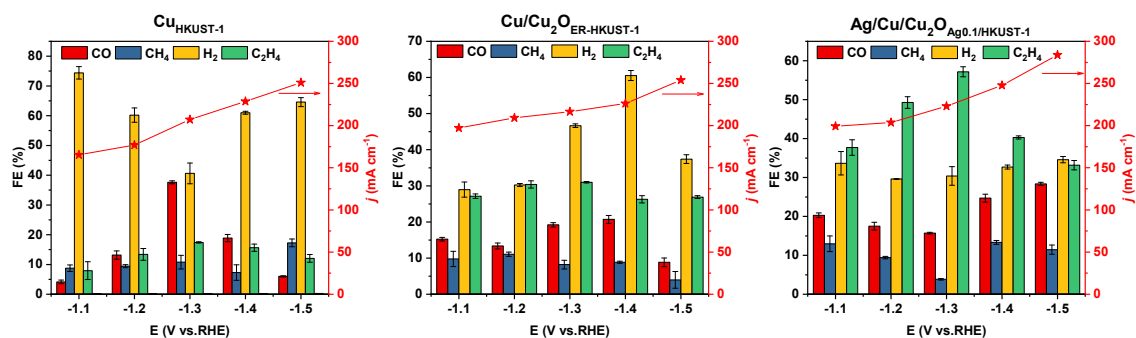

**Fig. S17.** The FE of all products and the corresponding current density for Cu<sub>HKUST-1</sub>, Cu/Cu<sub>2</sub>O<sub>ER-HKUST-1</sub> and Ag/Cu/Cu<sub>2</sub>O<sub>Ag0.1/HKUST-1</sub>.

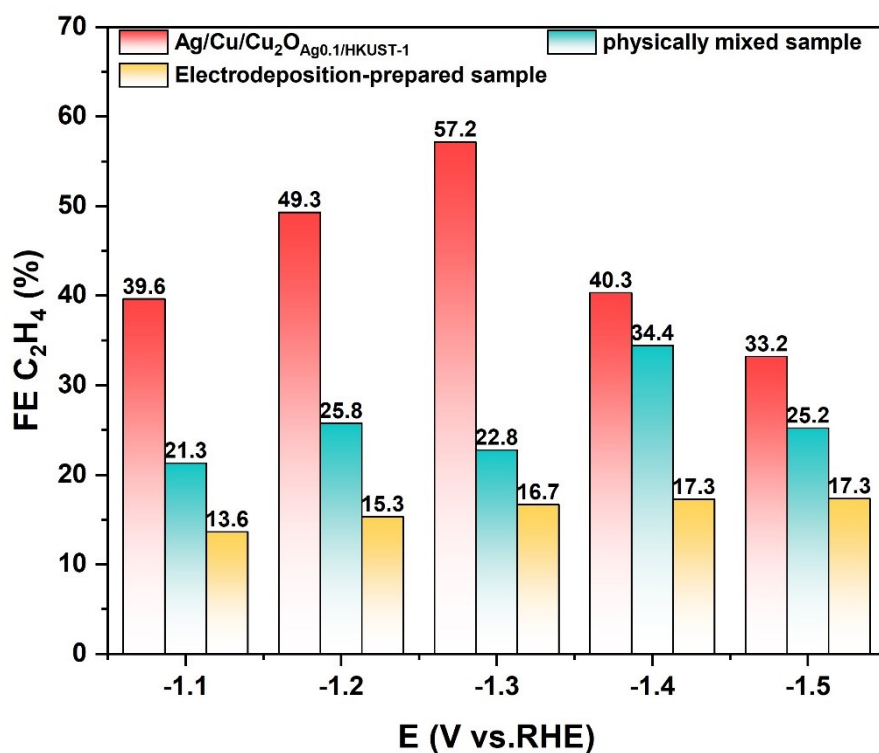

**Fig. S18.** FEs of C<sub>2</sub>H<sub>4</sub> on Ag/Cu/Cu<sub>2</sub>O<sub>Ag0.1/HKUST-1</sub>, physically mixed sample and electrodeposition-prepared sample at various working potentials.

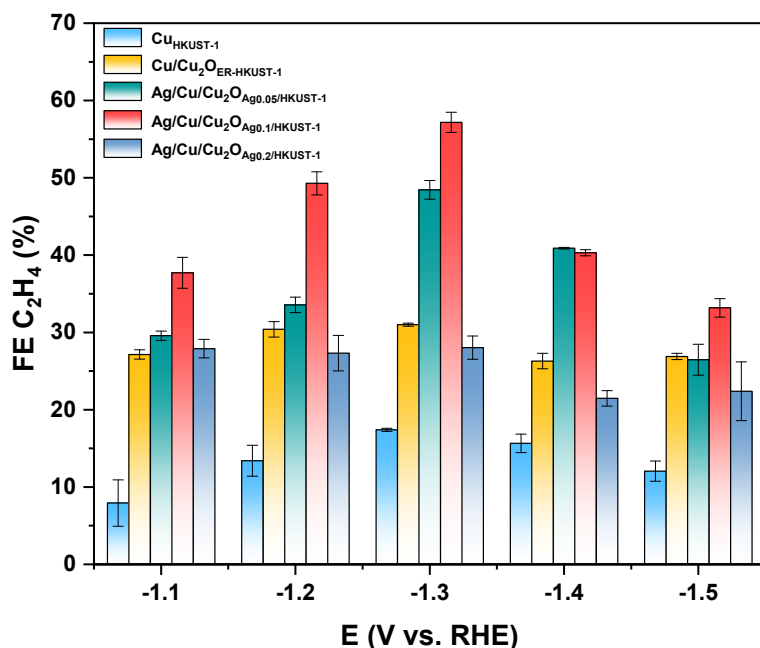

**Fig. S19.** FE for  $C_2H_4$  at different applied potentials of HKUST-1, ER-HKUST-1,  $Ag/Cu/Cu_2O_{Ag0.05}/HKUST-1$ ,  $Ag/Cu/Cu_2O_{Ag0.1}/HKUST-1$  and  $Ag/Cu/Cu_2O_{Ag0.2}/HKUST-1$ .

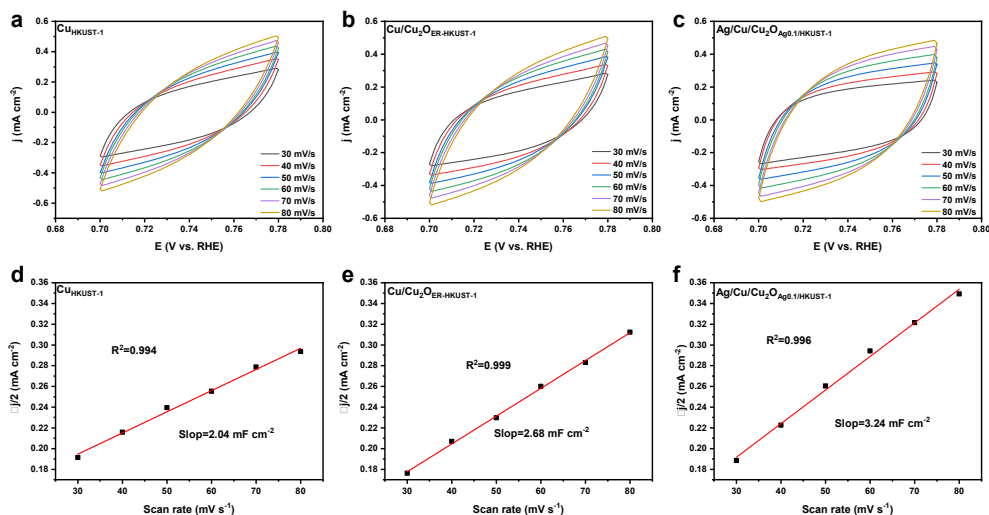

**Fig. S20.** (a-c) CVs with various scan rates of  $Cu_{HKUST-1}$ ,  $Cu/Cu_2O_{ER-HKUST-1}$  and  $Ag/Cu/Cu_2O_{Ag0.1}/HKUST-1$ . (d-f) Current due to double-layer charging plotted against scan rates of  $Cu_{HKUST-1}$ ,  $Cu/Cu_2O_{ER-HKUST-1}$  and  $Ag/Cu/Cu_2O_{Ag0.1}/HKUST-1$ .

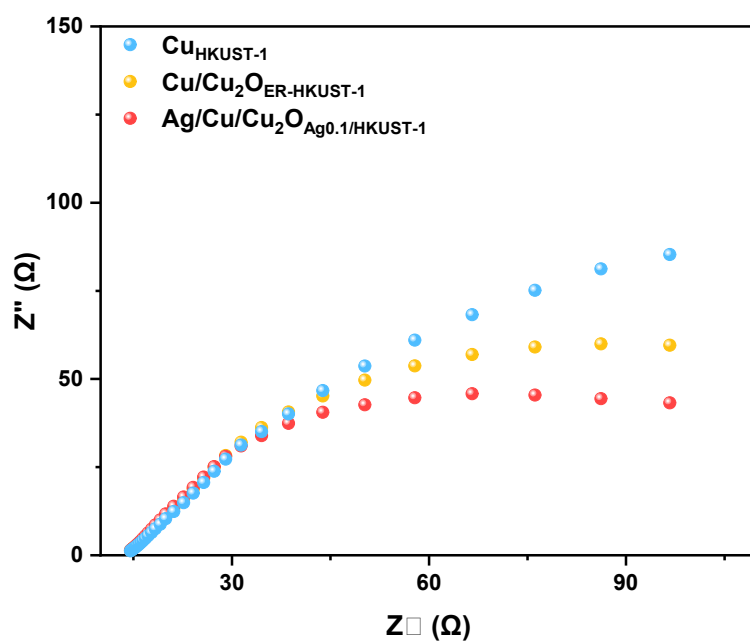

**Fig. S21.** EIS spectra of  $\text{Cu}_{\text{HKUST-1}}$ ,  $\text{Cu}/\text{Cu}_2\text{O}_{\text{ER-HKUST-1}}$  and  $\text{Ag}/\text{Cu}/\text{Cu}_2\text{O}_{\text{Ag}0.1}/\text{HKUST-1}$  at  $-1.0$  V vs. RHE for  $\text{CO}_2\text{RR}$ .

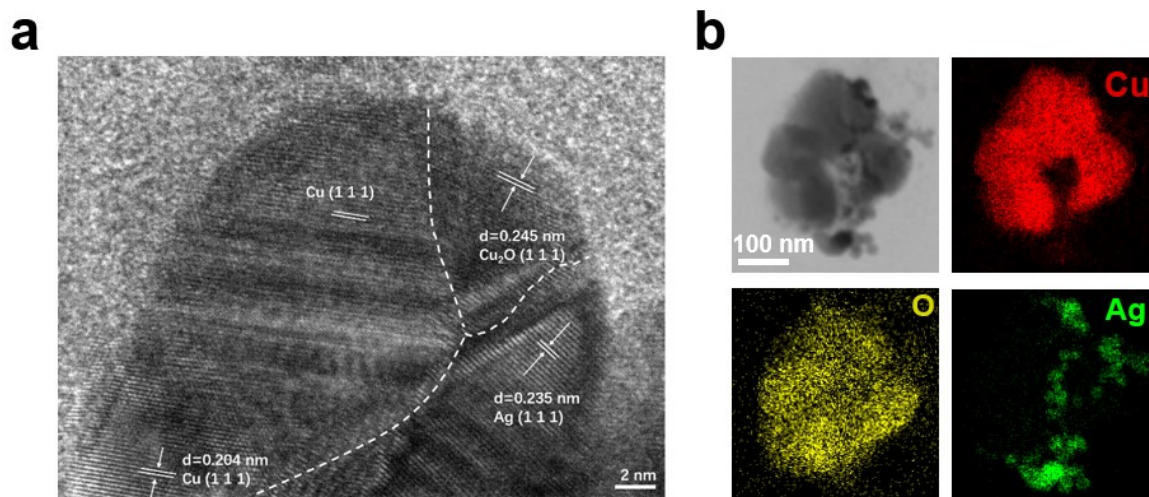

**Fig. S22.** (a) HR-TEM image and (b) elemental mapping of  $\text{Ag}/\text{Cu}/\text{Cu}_2\text{O}_{\text{Ag}0.1}/\text{HKUST-1}$  after  $\text{CO}_2\text{RR}$  test.

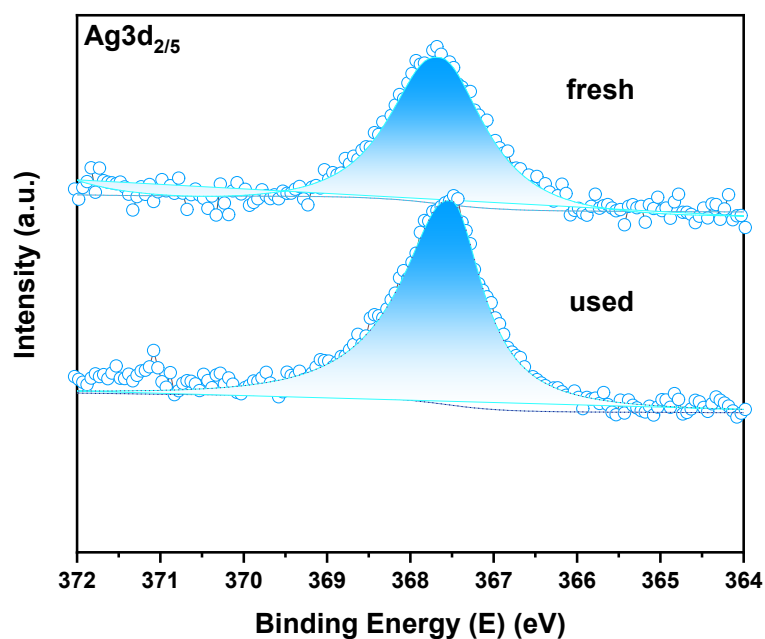

**Fig. S23.** High-resolution Ag 3d<sub>5/2</sub> XPS profile of Ag/Cu/Cu<sub>2</sub>O<sub>Ag0.1</sub>/HKUST-1 before and after CO<sub>2</sub>RR test.

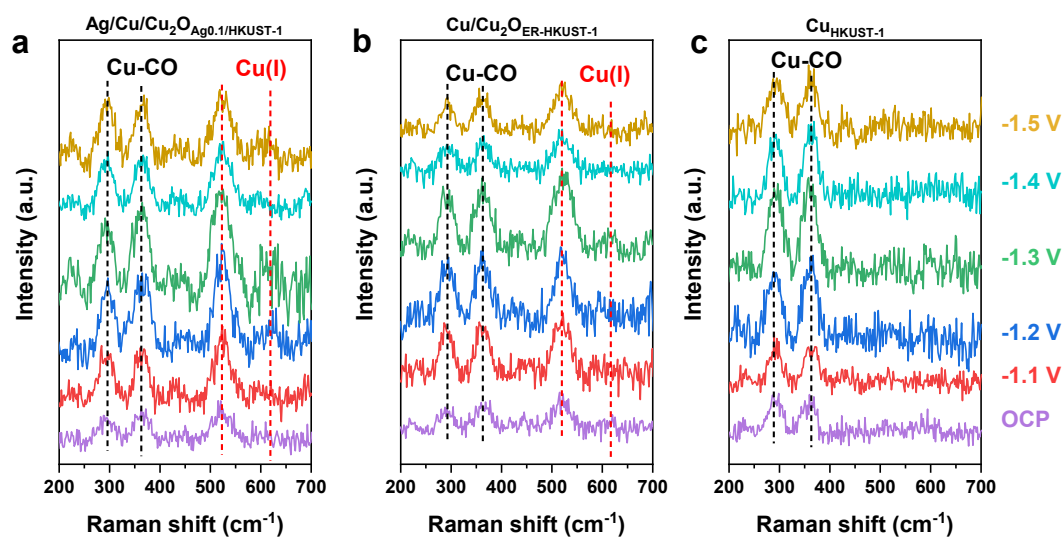

**Fig. S24.** *In situ* Raman spectra of (a) Ag/Cu/Cu<sub>2</sub>O<sub>Ag0.1</sub>/HKUST-1, (b) Cu/Cu<sub>2</sub>O<sub>ER</sub>-HKUST-1 and (c) Cu<sub>HKUST-1</sub> collected at different potentials during CO<sub>2</sub>RR.

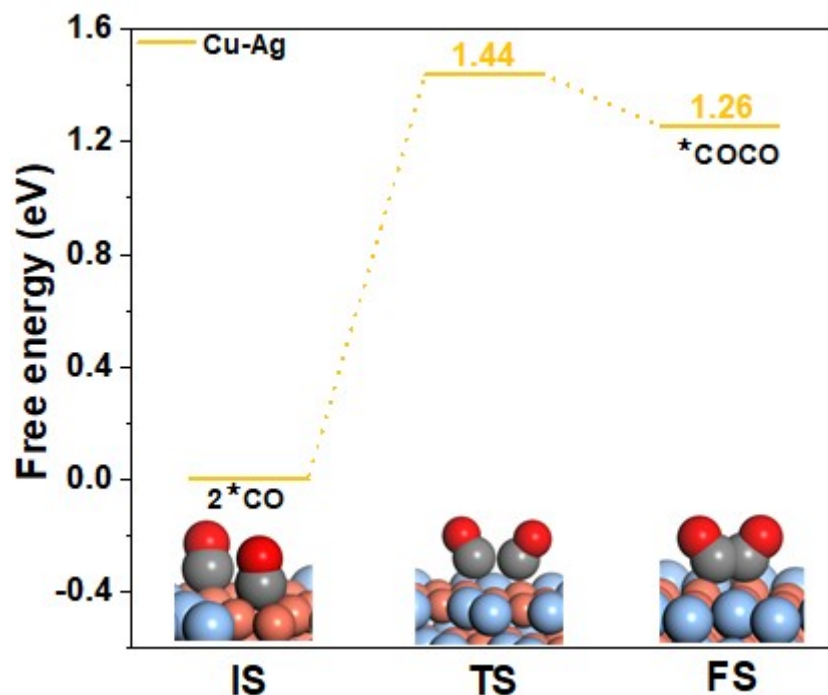

**Fig. S25.** Energy profiles for initial state (IS), transition state (TS) and final states (FS) of \*CO-\*CO coupling on a Cu-Ag model.

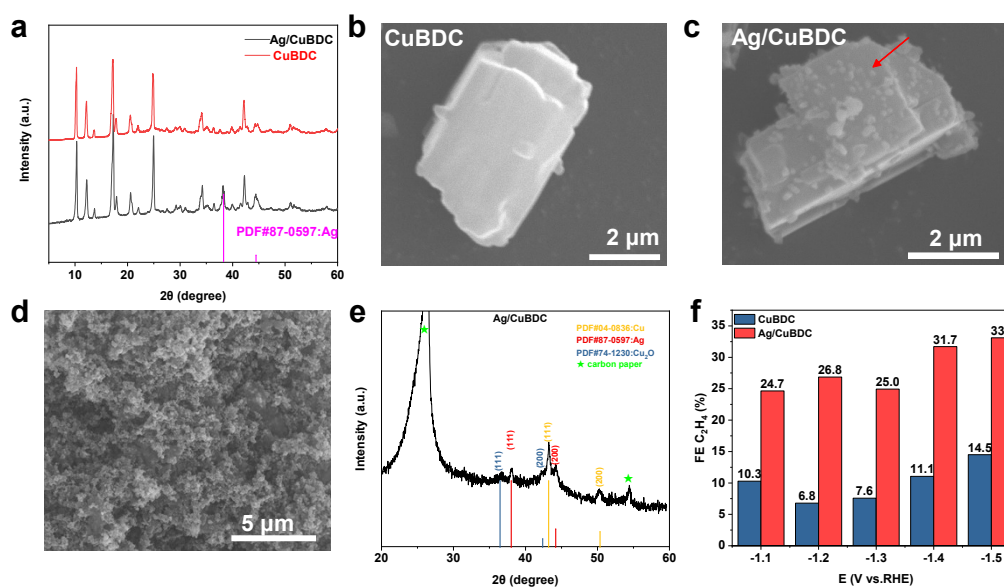

**Fig. S26.** (a) XRD patterns and (b and c) SEM images of CuBDC and Ag/CuBDC. (d) SEM image and (e) XRD pattern of Ag/CuBDC after reconstruction. (f) FE of C<sub>2</sub>H<sub>4</sub> on the reconstructed CuBDC and Ag/CuBDC at different applied potentials.

**Synthesis of CuBDC:** Cu(NO<sub>3</sub>)<sub>2</sub>·3H<sub>2</sub>O (0.50 g) was completely dissolved in 30 mL DMF, and then H<sub>2</sub>BDC (0.34 g) was added into the above solution with continuous

stirring for 5 h at 100 °C. The precipitates were centrifuged, washed with DMF and dried in a vacuum oven at 60 °C overnight.

**Synthesis of Ag/CuBDC:** AgNO<sub>3</sub> was dissolved in 20 mL hydroalcoholic solution ( $V_{\text{DMF}} : V_{\text{EtOH}} : V_{\text{H}_2\text{O}} = 10:9:1$ ), and then the as-prepared CuBDC was added into the above solution with continuous stirring for 20 h at 85 °C. The precipitates were centrifuged, washed with DMF and dried in a vacuum oven at 60 °C overnight.

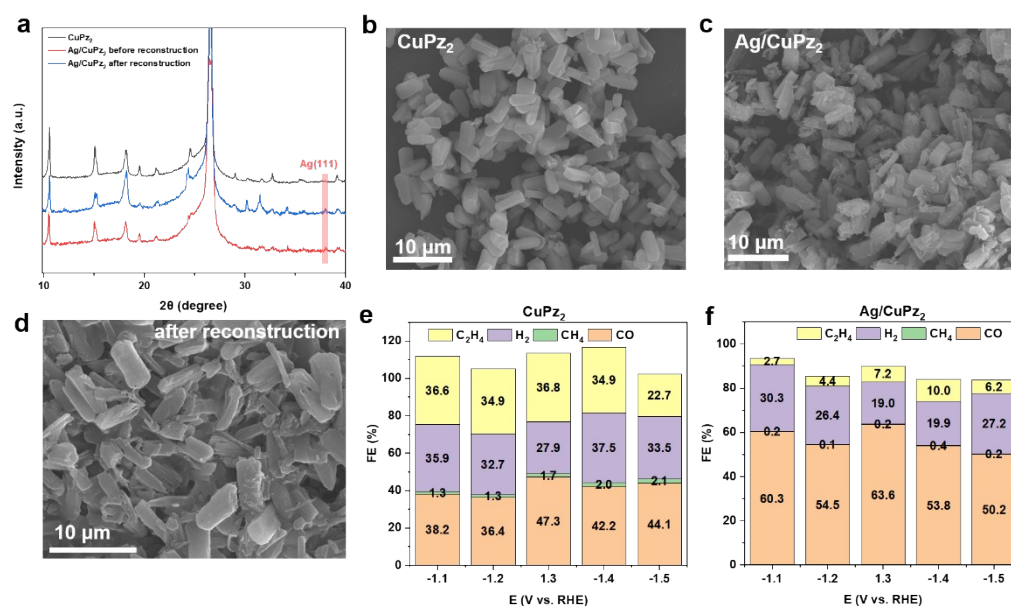

**Fig. S27.** (a) XRD patterns and (b-d) SEM images of CuPz<sub>2</sub>, Ag/CuPz<sub>2</sub> and reconstructed Ag/CuPz<sub>2</sub>. FE of C<sub>2</sub>H<sub>4</sub> at different applied potentials on (e) CuPz<sub>2</sub> and (f) Ag/CuPz<sub>2</sub>.

**Synthesis of CuPz<sub>2</sub>:** CuPz<sub>2</sub> was synthesized according to the reported literature with small modifications.<sup>[1]</sup> First, Cu(NO<sub>3</sub>)<sub>2</sub>·3H<sub>2</sub>O (1.691 g, 7 mmol) was completely dissolved in 40 mL of 28% concentrated ammonia solution, and then pyrazole (1.021 g, 15 mmol) was completely dissolved in 40 mL of 28% concentrated ammonia solution. Under vigorous stirring, the two solutions were mixed. The obtained dark blue suspension was stirred for 20 minutes to obtain a blue precipitate. The precipitate was filtered, washed several times with 28% concentrated ammonia and ultrapure water, and then dried overnight in a vacuum oven at 60 °C.

**Synthesis of Ag/CuPz<sub>2</sub>:** AgNO<sub>3</sub> was dissolved in 10 mL of hydroalcoholic solution (V<sub>EtOH</sub>: V<sub>H<sub>2</sub>O</sub> = 9:1), and then the as-prepared CuPz<sub>2</sub> was added into the above solution with continuous stirring for 20 h at 85 °C. The precipitates were centrifuged, washed with ethanol and dried in a vacuum oven at 60 °C overnight.



**Table S1. EXAFS fitting results**

| Sample                                          | Scattering path | Distance (Å) | C.N.    | $\sigma^2$ | $\Delta E_0$ (eV) | R-factor |
|-------------------------------------------------|-----------------|--------------|---------|------------|-------------------|----------|
| Ag Foil                                         | Ag-Ag           | 2.87         | 12      | 0.009      | 2.50±0.36         | 0.007    |
| Ag/Cu/Cu <sub>2</sub> O <sub>Ag0.1HKUST-1</sub> | Ag-Ag           | 2.86         | 9.8±1.4 | 0.009      | 1.48±0.88         | 0.006    |
| Cu <sub>2</sub> O                               | Cu-O            | 1.92         | 4       | 0.005      | -0.56±1.97        | 0.011    |
| Ag/Cu/Cu <sub>2</sub> O <sub>Ag0.1HKUST-1</sub> | Cu-O            | 1.94         | 2.8±0.3 | 0.001      | -1.09±1.41        | 0.009    |

Note: In Ag-Ag path  $S_0^2$  (0.971) was determined by Ag foil. In Cu-O path  $S_0^2$  (0.728) was determined by Cu<sub>2</sub>O.

**Table S2.** Electrochemical CO<sub>2</sub>RR Performance of Cu-based electrocatalysts toward C<sub>2</sub>H<sub>4</sub>.

| Entry            | Materials                                           | $j$<br>(mA cm <sup>-2</sup> ) | stability  | FE of C <sub>2</sub> H <sub>4</sub> | Cell             | Refs.            |
|------------------|-----------------------------------------------------|-------------------------------|------------|-------------------------------------|------------------|------------------|
| <b>This work</b> | <b>Ag<sub>0.1</sub>/HKUST-1</b>                     | <b>220</b>                    | <b>10h</b> | <b>57.2%</b>                        | <b>flow cell</b> | <b>This work</b> |
| 1                | S-HKUST-1                                           | 150                           | 8h         | 50%                                 | flow cell        | [2]              |
| 2                | CuPz <sub>2</sub> -Act-30                           | 15                            | 12h        | 70.2 ± 1.7%                         | H-cell           | [1]              |
| 3                | Cu dimer distorted<br>HKUST-1                       | 262                           | 2.3h       | 45%                                 | flow cell        | [3]              |
| 4                | Cu-N-C-800                                          | 27.6                          | 10h        | 24.8%                               | H-cell           | [4]              |
| 5                | Cutrz                                               | 280                           | 6h         | 50%                                 | flow cell        | [5]              |
| 6                | MAF-2E                                              | 10.9                          | 8h         | 51.2 ± 2.3%                         | H-cell           | [6]              |
| 7                | NNU-33(H)                                           | 176.08                        | 5h         | 27.71%                              | flow cell        | [7]              |
| 8                | Cu-ade MOF                                          | 8.5                           | 8h         | 45%                                 | H-cell           | [8]              |
| 9                | Cu-DBC                                              | 203                           | 2.5h       | ~4%                                 | flow cell        | [9]              |
| 10               | Cu <sub>2</sub> O@CuHHTP                            | 14.8                          | 5h         | ~5%                                 | H-cell           | [10]             |
| 11               | PorCu                                               | 48                            | 1h         | ~17%                                | H-cell           | [11]             |
| 12               | CPFs                                                | 10.2                          | 2h         | 18%                                 | H-cell           | [12]             |
| 13               | AuNN@PCN-<br>222(Cu)                                | ~10                           | 10h        | 52.5%                               | H-cell           | [13]             |
| 14               | PcCu-Cu-O                                           | 7.3                           | 4h         | 50%                                 | H-cell           | [14]             |
| 15               | CuPc                                                | 11.2                          | 2.8h       | 25%                                 | H-cell           | [15]             |
| 16               | Co-doped<br>Cu <sub>2</sub> (BDC) <sub>2</sub>      | 282                           | 3h         | 15.6%                               | flow cell        | [16]             |
| 17               | BEN-Cu-BTC                                          | 7                             | 8h         | 11.2%                               | H-cell           | [17]             |
| 18               | Cu-CPW                                              | 13.2                          | 5h         | 20%                                 | H-cell           | [18]             |
| 19               | 2F-Cu-BDC                                           | 150                           | 3h         | 40%                                 | flow cell        | [19]             |
| 20               | Cu nanoribbons.                                     | 200                           | 10h        | 42%                                 | flow cell        | [20]             |
| 21               | Cu-PzH                                              | 346                           | 3.8h       | 60%                                 | flow cell        | [21]             |
| 22               | e-Pb/Cu <sub>2</sub> O-3.4%                         | 203.8                         | 10h        | ~33%                                | flow cell        | [22]             |
| 23               | Cu <sub>2</sub> O@SiO <sub>2</sub> -NH <sub>2</sub> | 280                           | 15h        | 35%                                 | flow cell        | [23]             |
| 24               | ZrO <sub>2</sub> /Cu-Cu <sub>2</sub> O              | 24                            | 6h         | 62.5%                               | H-cell           | [24]             |
| 25               | Ag@Cu <sub>2</sub> O-2                              | 100                           | 10h        | 31.5%                               | flow cell        | [25]             |
| 26               | Cu <sub>2</sub> O-BN                                | ~40                           | 14h        | 15%                                 | H-cell           | [26]             |

## REFERENCES

- [1] C. Liu, X.-D. Zhang, J.-M. Huang, M.-X. Guan, M. Xu and Z.-Y. Gu, *ACS Catalysis* **2022**, *12*, 15230-15240.
- [2] C. F. Wen, M. Zhou, P. F. Liu, Y. Liu, X. Wu, F. Mao, S. Dai, B. Xu, X. L. Wang, Z. Jiang, P. Hu, S. Yang, H. F. Wang and H. G. Yang, *Angewandte Chemie-International Edition* **2022**, *61*, e202111700.
- [3] N. Dae-Hyun, O. S. Bushuyev, J. Li, P. De Luna, A. Seifitokaldani, D. Cao-Thang, F. P. G. de Arquer, Y. Wang, Z. Liang, A. H. Proppe, C. S. Tan, P. Todorovic, O. Shekhah, C. M. Gabardo, J. W. Jo, J. Choi, M.-J. Choi, S.-W. Baek, J. Kim, D. Sinton, S. O. Kelley, M. Eddaoudi and E. H. Sargent, *Journal of the American Chemical Society* **2018**, *140*, 11378-11386.
- [4] A. Guan, Z. Chen, Y. Quan, C. Peng, Z. Wang, T.-K. Sham, C. Yang, Y. Ji, L. Qian, X. Xu and G. Zheng, *ACS Energy Letters* **2020**, *5*, 1044-1053.
- [5] D.-S. Huang, H.-L. Zhu, Z.-H. Zhao, J.-R. Huang, P.-Q. Liao and X.-M. Chen, *ACS Catalysis* **2022**, *12*, 8444-8450.
- [6] L.-L. Zhuo, P. Chen, K. Zheng, X.-W. Zhang, J.-X. Wu, D.-Y. Lin, S.-Y. Liu, Z.-S. Wang, J.-Y. Liu, D.-D. Zhou and J.-P. Zhang, *Angewandte Chemie-International Edition* **2022**, *61*, e202204967.
- [7] L. Zhang, X.-X. Li, Z.-L. Lang, Y. Liu, J. Liu, L. Yuan, W.-Y. Lu, Y.-S. Xia, L.-Z. Dong, D.-Q. Yuan and Y.-Q. Lan, *Journal of the American Chemical Society* **2021**, *143*, 3808-3816.
- [8] F. Yang, A. Chen, P. L. Deng, Y. Zhou, Z. Shahid, H. Liu and B. Y. Xia, *Chemical Science* **2019**, *10*, 7975-7981.
- [9] Y. Zhang, L.-Z. Dong, S. Li, X. Huang, J.-N. Chang, J.-H. Wang, J. Zhou, S.-L. Li and Y.-Q. Lan, *Nature Communications* **2021**, *12*, 6390.
- [10] J.-D. Yi, R. Xie, Z.-L. Xie, G.-L. Chai, T.-F. Liu, R.-P. Chen, Y.-B. Huang and R. Cao, *Angewandte Chemie-International Edition* **2020**, *59*, 23641-23648.
- [11] Z. Weng, J. Jiang, Y. Wu, Z. Wu, X. Guo, K. L. Materna, W. Liu, V. S. Batista, G. W. Brudvig and H. Wang, *Journal of the American Chemical Society* **2016**, *138*, 8076-8079.
- [12] Y. Zhou, S. Chen, S. Xi, Z. Wang, P. Deng, F. Yang, Y. Han, Y. Pang and B. Y. Xia, *Cell Reports Physical Science* **2020**, *1*.
- [13] X. Xie, X. Zhang, M. Xie, L. Xiong, H. Sun, Y. Lu, Q. Mu, M. H. Rummeli, J. Xu, S. Li, J. Zhong, Z. Deng, B. Ma, T. Cheng, W. A. Goddard, III and Y. Peng, *Nature Communications* **2022**, *13*.
- [14] X.-F. Qiu, H.-L. Zhu, J.-R. Huang, P.-Q. Liao and X.-M. Chen, *Journal of the American Chemical Society* **2021**, *143*, 7242-7246.
- [15] S. Kusama, T. Saito, H. Hashiba, A. Sakai and S. Yotsuhashi, *ACS Catalysis* **2017**, *7*, 8382-8385.
- [16] B. Kim, Y. C. Tan, Y. Ryu, K. Jang, H. G. Abbas, T. Kang, H. Choi, K.-S. Lee, S. Park, W. Kim, P.-P. Choi, S. Ringe and J. Oh, *ACS Energy Letters* **2023**, *8*, 3356-3364.
- [17] Y.-S. Cheng, X.-P. Chu, M. Ling, N. Li, K.-L. Wu, F.-H. Wu, H. Li, G. Yuan and X.-W. Wei, *Catalysis Science & Technology* **2019**, *9*, 5668-5675.
- [18] W. Zhang, C. Huang, J. Zhu, Q. Zhou, R. Yu, Y. Wang, P. An, J. Zhang, M. Qiu, L. Zhou, L. Mai, Z. Yi and Y. Yu, *Angewandte Chemie-International Edition* **2022**, *61*, e202112116.
- [19] R. Chen, L. Cheng, J. Liu, Y. Wang, W. Ge, C. Xiao, H. Jiang, Y. Li and C. Li, *Small* **2022**, *18*, 2200720.
- [20] H. Huo, J. Wang, Q. Fan, Y. Hu and J. Yang, *Advanced Energy Materials* **2021**, *11*, 2102447.
- [21] R. Wang, J. Liu, Q. Huang, L.-Z. Dong, S.-L. Li and Y.-Q. Lan, *Angewandte Chemie-International Edition* **2021**, *60*, 19829-19835.
- [22] X. Ma, X. Song, L. Zhang, L. Wu, J. Feng, S. Jia, X. Tan, L. Xu, X. Sun and B. Han, *Green Chemistry*

**2023**, *25*, 7635-7641.

[23] Z.-Y. Zhang, H. Tian, H. Jiao, X. Wang, L. Bian, Y. Liu, N. Khaorapapong, Y. Yamauchi and Z.-L. Wang, *Journal of Materials Chemistry A* **2024**, *12*, 1218-1232.

[24] P. P. Guo, Z. H. He, S. Y. Yang, W. T. Wang, K. Wang, C. C. Li, Y. Y. Wei, Z. T. Liu and B. X. Han, *Green Chemistry* **2022**, *24*, 1527-1533.

[25] F. Yu, X. Liu, L. Liao, G. Xia and H. Wang, *Small* **2023**, *19*.

[26] Y. Zhou, Y. Yao, R. Zhao, X. Wang, Z. Fu, D. Wang, H. Wang, L. Zhao, W. Ni, Z. Yang and Y.-M. Yan, *Angewandte Chemie-International Edition* **2022**, *61*.
